# Supplementary material for: Pickering emulsion gels based on insoluble chitosan/gelatin electrostatic complexes
Source: Royal Society of Chemistry journal article supplement (doi:10.1039/c6ra10378b), 2016-01-01
Supplement: c6ra10378b1.pdf [file c6ra10378b1.pdf]

**Pickering emulsion gels based on insoluble  
chitosan/gelatin electrostatic complexes**

*Supporting Information*

Xiao-Yan Wang, Marie-Claude Heuzey\*

Department of Chemical Engineering, CREPEC, Polytechnique Montréal, PO Box 6079,

Station Centre-Ville, Montréal, QC, Canada, H3C 3A7

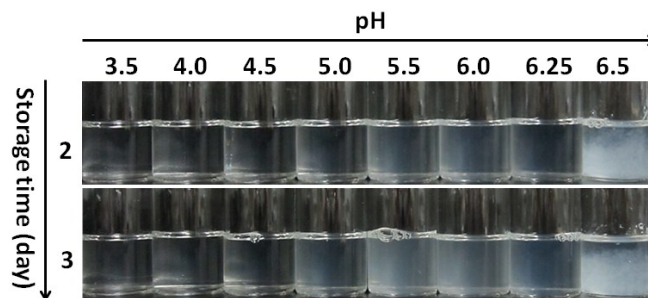

Fig. S1. Visual observation of CH/GB complexes (1 wt %, CH:GB = 1:2) at various pH values (3.5 to 6.5) and storage times (day 2 and day 3). All the samples are transparent on day 1 except for pH 6.5.

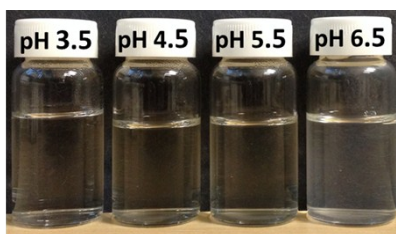

Fig. S2. Visual observation of high intensity ultrasonication-treated CH/GB complexes (1 wt %, CH:GB = 1:2, storage time: 3 days) at various pH values (3.5 to 6.5).

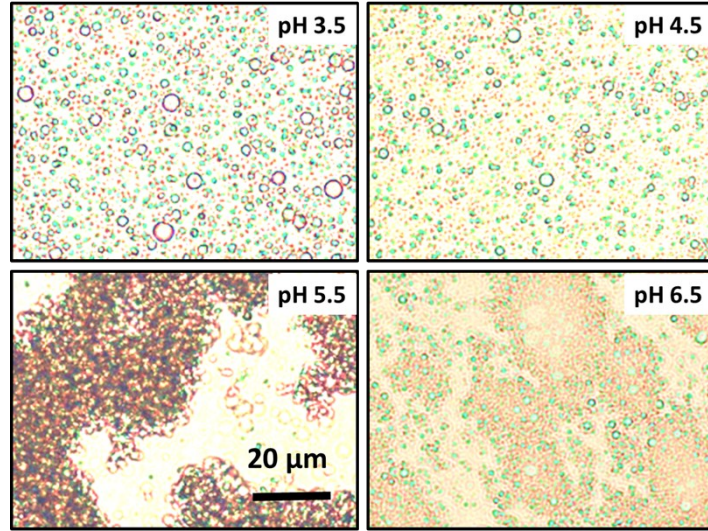

Fig. S3. Optical microscopy images of fresh emulsions prepared with GB at different pH values (3.5-6.5).

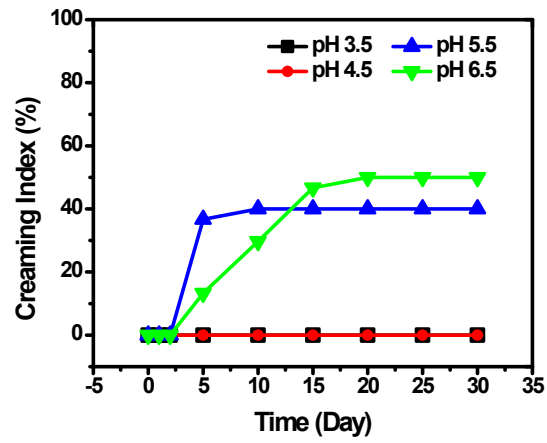

Fig. S4. Creaming index of GB-based emulsions (oil volume fraction = 0.1) prepared at different pH (3.5 to 6.5) and storage time (up to 1 month).
